# Supplementary material for: Translation and validation of the simplified Chinese new Knee Society Scoring System
Source: Springer Nature journal article supplement (doi:10.1186/s12891-015-0854-1), 2015-12-01
Supplement: MOESM1 [file 9752926]

## 术前膝关节社会评分

| 患者基本信息（患者完成）                                      |                          |                                                 |
|---------------------------------------------------|--------------------------|-------------------------------------------------|
| 1-填写时间                                            | 2-出生日期                   | 时间格式                                            |
| □□/□□/□□                                          | □□/□□/□□                 | 月/日/年                                           |
| 3-身高（厘米）                                          | 4-体重（千克）                 | 5-性别                                            |
| _____ cm                                          | _____ Kg                 | <input type="radio"/> 男 <input type="radio"/> 女 |
| 6-有症状的膝关节（如果双膝都准备手术，则双侧膝关节各填写一份）                  |                          |                                                 |
| <input type="radio"/> 左 <input type="radio"/> 右   |                          |                                                 |
| 7-民族 _____                                        |                          |                                                 |
| 8-请说明你所希望的手术时间及手术医生名字                             |                          |                                                 |
| 日期 □□/□□/□□                                       | 手术医生名字 _____             |                                                 |
| 时间格式：月/日/年                                        |                          |                                                 |
| 9-初次膝关节置换还是翻修                                     |                          |                                                 |
| <input type="radio"/> 初次 <input type="radio"/> 翻修 |                          |                                                 |
| 医生完成部分                                            |                          |                                                 |
| 10-功能受限分类（使用以下代码） <input type="checkbox"/>        |                          |                                                 |
| A 单侧膝关节炎                                          | C1 TKR 但远期关节炎影响移动        |                                                 |
| B1 一侧 TKA, 对侧膝关节炎                                 | C2 TKR 但身体状况影响移动         |                                                 |
| B2 双侧 TKA                                         | C3 单侧或双侧 TKR 伴有单侧或双侧 THR |                                                 |

### 客观的膝关节指标（医生完成）

| 力线                      |               |                                                                                  |  |
|-------------------------|---------------|----------------------------------------------------------------------------------|--|
| 1-解剖学力线：站立前后侧位 X 线片     |               | 最大值 25 分                                                                         |  |
| 中立位：2-10° 外翻 （25'）      |               | <input style="width: 60px; height: 40px; border: 1px solid black;" type="text"/> |  |
| 内翻：<2° 内翻 （-10'）        |               |                                                                                  |  |
| 外翻：>10° 外翻 （-10'）       |               |                                                                                  |  |
| 不稳定性                    |               |                                                                                  |  |
| 2-内/外侧不稳定性：完全伸直位测量      |               | 最大值 15 分                                                                         |  |
| 无 （15'）                 | 轻微或<5mm （15'） | <input style="width: 60px; height: 40px; border: 1px solid black;" type="text"/> |  |
| 中度或 5mm （5'）            | 重度或>5mm （0'）  |                                                                                  |  |
| 3-前/后不稳定性：屈曲 90° 测量     |               | 最大值 10 分                                                                         |  |
| 无 （10'）                 | 中度<5mm （5'）   | <input style="width: 60px; height: 40px; border: 1px solid black;" type="text"/> |  |
| 中度>5mm （0'）             |               |                                                                                  |  |
| 关节活动                    |               |                                                                                  |  |
| 4-活动范围（扣分项目，每 5° 为 1 分） |               | <input style="width: 60px; height: 40px; border: 1px solid black;" type="text"/> |  |
| 屈曲挛缩                    |               | 扣分值                                                                              |  |
| 1-5° （-2'）              | 6-10 （-5'）    | <input style="width: 60px; height: 40px; border: 1px solid black;" type="text"/> |  |
| 11-15° （-10'）           | >15° （-15'）   |                                                                                  |  |
| 伸直受限                    |               | 扣分值                                                                              |  |
| <10° （-5'）              | 10-20° （-10'） | <input style="width: 60px; height: 40px; border: 1px solid black;" type="text"/> |  |
| >20° （-15'）             |               |                                                                                  |  |

| 症状（患者完成）                                                                                                                                                                                                                                                                                                                                                                                                                                                                                                                                                                                                       |                                                         |   |   |   |   |   |   |   |   |    |    |                                                         |
|----------------------------------------------------------------------------------------------------------------------------------------------------------------------------------------------------------------------------------------------------------------------------------------------------------------------------------------------------------------------------------------------------------------------------------------------------------------------------------------------------------------------------------------------------------------------------------------------------------------|---------------------------------------------------------|---|---|---|---|---|---|---|---|----|----|---------------------------------------------------------|
| <p>1-走路时的疼痛程度 <span style="float: right;">(10分)</span></p> <table border="1" style="width: 100%; border-collapse: collapse; text-align: center;"> <tr> <td style="width: 20px;">0</td><td style="width: 20px;">1</td><td style="width: 20px;">2</td><td style="width: 20px;">3</td><td style="width: 20px;">4</td><td style="width: 20px;">5</td><td style="width: 20px;">6</td><td style="width: 20px;">7</td><td style="width: 20px;">8</td><td style="width: 20px;">9</td><td style="width: 20px;">10</td> </tr> </table> <p style="text-align: center;">无疼痛 <span style="float: right;">严重疼痛</span></p>    | 0                                                       | 1 | 2 | 3 | 4 | 5 | 6 | 7 | 8 | 9  | 10 | <input style="width: 60px; height: 30px;" type="text"/> |
| 0                                                                                                                                                                                                                                                                                                                                                                                                                                                                                                                                                                                                              | 1                                                       | 2 | 3 | 4 | 5 | 6 | 7 | 8 | 9 | 10 |    |                                                         |
| <p>2-走楼梯或爬坡时疼痛程度 <span style="float: right;">(10分)</span></p> <table border="1" style="width: 100%; border-collapse: collapse; text-align: center;"> <tr> <td style="width: 20px;">0</td><td style="width: 20px;">1</td><td style="width: 20px;">2</td><td style="width: 20px;">3</td><td style="width: 20px;">4</td><td style="width: 20px;">5</td><td style="width: 20px;">6</td><td style="width: 20px;">7</td><td style="width: 20px;">8</td><td style="width: 20px;">9</td><td style="width: 20px;">10</td> </tr> </table> <p style="text-align: center;">无疼痛 <span style="float: right;">严重疼痛</span></p> | 0                                                       | 1 | 2 | 3 | 4 | 5 | 6 | 7 | 8 | 9  | 10 | <input style="width: 60px; height: 30px;" type="text"/> |
| 0                                                                                                                                                                                                                                                                                                                                                                                                                                                                                                                                                                                                              | 1                                                       | 2 | 3 | 4 | 5 | 6 | 7 | 8 | 9 | 10 |    |                                                         |
| <p>3-你感觉你的膝关节“正常”吗？ <span style="float: right;">(5分)</span></p> <p>○经常（5'）    ○有时（3'）    ○从来没有过（0'）</p>                                                                                                                                                                                                                                                                                                                                                                                                                                                                                                        | <input style="width: 60px; height: 30px;" type="text"/> |   |   |   |   |   |   |   |   |    |    |                                                         |
| <p>最大总分值（25分）</p>                                                                                                                                                                                                                                                                                                                                                                                                                                                                                                                                                                                              | <input style="width: 60px; height: 30px;" type="text"/> |   |   |   |   |   |   |   |   |    |    |                                                         |

| 患者满意度（患者完成）                                                                                                                                                                                                                          |  |
|--------------------------------------------------------------------------------------------------------------------------------------------------------------------------------------------------------------------------------------|--|
| <p>1-目前，坐下时，你对膝关节的疼痛水平满意吗？ <span style="float: right;">(8分)</span></p> <p>○非常满意    ○满意    ○比较满意    ○不满意    ○非常不满意</p> <p style="text-align: center;">(8' )            (6' )            (4' )            (2' )            (0' )</p>   |  |
| <p>2-目前，躺床上时，你对膝关节的疼痛水平满意吗？ <span style="float: right;">(8分)</span></p> <p>○非常满意    ○满意    ○比较满意    ○不满意    ○非常不满意</p> <p style="text-align: center;">(8' )            (6' )            (4' )            (2' )            (0' )</p>  |  |
| <p>3-目前，起床时，你对膝关节的功能满意吗？ <span style="float: right;">(8分)</span></p> <p>○非常满意    ○满意    ○比较满意    ○不满意    ○非常不满意</p> <p style="text-align: center;">(8' )            (6' )            (4' )            (2' )            (0' )</p>     |  |
| <p>4-目前，做轻微家务活时，你对膝关节的功能满意吗？ <span style="float: right;">(8分)</span></p> <p>○非常满意    ○满意    ○比较满意    ○不满意    ○非常不满意</p> <p style="text-align: center;">(8' )            (6' )            (4' )            (2' )            (0' )</p> |  |

5-目前，散步时，你对膝关节的功能满意吗？ (8分)

- 非常满意 (8')      满意 (6')      比较满意 (4')      不满意 (2')      非常不满意 (0')

最大总分值 (40')

患者的期望 (患者完成)

完成膝关节置换术后你有什么样的期待？

1-你期待膝关节置换术后会减轻膝关节的疼痛吗？ (5')

- 不，一点也不 (1')      是的，一点点 (2')  
是的，有一些 (3')      是的，比较期待 (4')  
是的，非常期待 (5')

2-你期待膝关节置换术后能完成日常生活中的正常活动吗？ (5')

- 不，一点也不 (1')      是的，一点点 (2')  
是的，有一些 (3')      是的，比较期待 (4')  
是的，非常期待 (5')

3-你期待膝关节置换术后能完成休息、娱乐或体育活动吗？

(5')

- 不，一点也不 (1')      是的，一点点 (2')  
是的，有一些 (3')      是的，比较期待 (4')  
是的，非常期待 (5')

最大总分 (15')

功能活动（患者完成）

|                                                          |                          |
|----------------------------------------------------------|--------------------------|
| 1-你可以行走不需要任何帮助吗？（如手杖、拐杖或轮椅）                              | (0' )                    |
| ○ 是                      ○ 不是                            |                          |
| 2-如果不是，需要使用以下哪些辅助物？                                      | (-10' )                  |
| 1. 轮椅 (-10' )    2. 助步器 (-8' )    3. 两根拐杖 (-8' )         |                          |
| 4. 两根手杖(-6' )    5. 一根拐杖(-4' )    6. 一根手杖(-4' )          | <input type="checkbox"/> |
| 7. 护膝或者膝关节支具 (-2' )                                      |                          |
| 其他 _____                                                 |                          |
| 3-你使用这些辅助物是因为你的膝关节吗？                                     | (0' )                    |
| ○ 是                      ○ 不是                            |                          |
| 4. 由于膝关节感觉不适而坐前，你能站多长时间（在有或没有辅助物的情况下）？                   | (15' )                   |
| 1. 不能站立 (0' )    2. 0-5 分钟 (3' )    3. 6-15 分钟 (6' )     | <input type="checkbox"/> |
| 4. 16-30 分钟 (9' )    5. 31-60 分钟 (12' )    6. >1h (15' ) |                          |
| 5-由于膝关节不适而停下来之前，你能走多长时间（有或没有辅助物的情况下）？                    | (15' )                   |
| 1. 不能站立 (0' )    2. 0-5 分钟 (3' )    3. 6-15 分钟 (6' )     | <input type="checkbox"/> |
| 4. 16-30 分钟 (9' )    5. 31-60 分钟 (12' )    6. >1h (15' ) |                          |

最大分值 (30 分' )

活动标准 (30' )

| 在以下的每一个活动中你的膝关节困扰你多少? | 没有困扰 (5' )            | 轻微 (4' )              | 中等 (3' )              | 严重 (2' )              | 非常严重 (1' )            | 不能做 (因为膝关节) (0' )     | 从来不做这个                |                      |
|-----------------------|-----------------------|-----------------------|-----------------------|-----------------------|-----------------------|-----------------------|-----------------------|----------------------|
| 1-不平地面上行走             | <input type="radio"/> | <input type="radio"/> | <input type="radio"/> | <input type="radio"/> | <input type="radio"/> | <input type="radio"/> | <input type="radio"/> | <input type="text"/> |
| 2-转动或旋转腿              | <input type="radio"/> | <input type="radio"/> | <input type="radio"/> | <input type="radio"/> | <input type="radio"/> | <input type="radio"/> | <input type="radio"/> | <input type="text"/> |
| 3-向上或向下爬一段楼梯          | <input type="radio"/> | <input type="radio"/> | <input type="radio"/> | <input type="radio"/> | <input type="radio"/> | <input type="radio"/> | <input type="radio"/> | <input type="text"/> |
| 4-不需要手从矮沙发或椅子上起立      | <input type="radio"/> | <input type="radio"/> | <input type="radio"/> | <input type="radio"/> | <input type="radio"/> | <input type="radio"/> | <input type="radio"/> | <input type="text"/> |
| 5-进出小汽车               | <input type="radio"/> | <input type="radio"/> | <input type="radio"/> | <input type="radio"/> | <input type="radio"/> | <input type="radio"/> | <input type="radio"/> | <input type="text"/> |
| 6-侧移                  | <input type="radio"/> | <input type="radio"/> | <input type="radio"/> | <input type="radio"/> | <input type="radio"/> | <input type="radio"/> | <input type="radio"/> | <input type="text"/> |
| 最大分值 (30' )           |                       |                       |                       |                       |                       |                       |                       | <input type="text"/> |

进一步活动 (25' )

|             |                       |                       |                       |                       |                       |                       |                       |                      |
|-------------|-----------------------|-----------------------|-----------------------|-----------------------|-----------------------|-----------------------|-----------------------|----------------------|
| 1-爬梯子或踏凳    | <input type="radio"/> | <input type="radio"/> | <input type="radio"/> | <input type="radio"/> | <input type="radio"/> | <input type="radio"/> | <input type="radio"/> | <input type="text"/> |
| 2-提购物袋走100米 | <input type="radio"/> | <input type="radio"/> | <input type="radio"/> | <input type="radio"/> | <input type="radio"/> | <input type="radio"/> | <input type="radio"/> | <input type="text"/> |
| 3-下蹲        | <input type="radio"/> | <input type="radio"/> | <input type="radio"/> | <input type="radio"/> | <input type="radio"/> | <input type="radio"/> | <input type="radio"/> | <input type="text"/> |
| 4-下跪        | <input type="radio"/> | <input type="radio"/> | <input type="radio"/> | <input type="radio"/> | <input type="radio"/> | <input type="radio"/> | <input type="radio"/> | <input type="text"/> |
| 5-跑         | <input type="radio"/> | <input type="radio"/> | <input type="radio"/> | <input type="radio"/> | <input type="radio"/> | <input type="radio"/> | <input type="radio"/> | <input type="text"/> |
| 最大分值 (25' ) |                       |                       |                       |                       |                       |                       |                       | <input type="text"/> |

## 任意活动

请挑选以下 3 种你认为对你最重要的活动  
(请不要写下额外的活动)

|                                                                                                                                                                                                                                                                                                                                                                                                            |                                                                                                                                                                                                                                                                                                                               |
|------------------------------------------------------------------------------------------------------------------------------------------------------------------------------------------------------------------------------------------------------------------------------------------------------------------------------------------------------------------------------------------------------------|-------------------------------------------------------------------------------------------------------------------------------------------------------------------------------------------------------------------------------------------------------------------------------------------------------------------------------|
| <p><b>娱乐活动</b></p> <p><input type="checkbox"/> 游泳</p> <p><input type="checkbox"/> 高尔夫 (18 杆)</p> <p><input type="checkbox"/> 公路自行车骑行 (&gt;30 分钟)</p> <p><input type="checkbox"/> 园艺工作</p> <p><input type="checkbox"/> 打保龄球</p> <p><input type="checkbox"/> 球拍类运动 (如网球、回力网球等)</p> <p><input type="checkbox"/> 距离行走</p> <p><input type="checkbox"/> 跳舞/芭蕾舞</p> <p><input type="checkbox"/> 拉伸运动 (拉伸你的肌肉)</p> | <p><b>锻炼和健身活动</b></p> <p><input type="checkbox"/> 举重</p> <p><input type="checkbox"/> 腿扩展</p> <p><input type="checkbox"/> 楼梯爬行</p> <p><input type="checkbox"/> 任意骑自行车/旋转</p> <p><input type="checkbox"/> 腿推举</p> <p><input type="checkbox"/> 慢跑</p> <p><input type="checkbox"/> 空中漫步机</p> <p><input type="checkbox"/> 有氧运动</p> |
|------------------------------------------------------------------------------------------------------------------------------------------------------------------------------------------------------------------------------------------------------------------------------------------------------------------------------------------------------------------------------------------------------------|-------------------------------------------------------------------------------------------------------------------------------------------------------------------------------------------------------------------------------------------------------------------------------------------------------------------------------|

请把以上已选的三种活动写入一下的空格中

在以下的每一个活动中你的膝关节困扰你多少？

| 活动 (写上从上面的列表<br>中选 3 种活<br>动) | 没有<br>困扰<br>(5')      | 轻微<br>(4')            | 中等<br>(3')            | 严重<br>(2')            | 非常<br>严重<br>(1')      | 不能做<br>(因为<br>膝关节)<br>(0') | 从来<br>不做<br>这个        |  |
|-------------------------------|-----------------------|-----------------------|-----------------------|-----------------------|-----------------------|----------------------------|-----------------------|--|
| 1-                            | <input type="radio"/> | <input type="radio"/> | <input type="radio"/> | <input type="radio"/> | <input type="radio"/> | <input type="radio"/>      | <input type="radio"/> |  |
| 2-                            | <input type="radio"/> | <input type="radio"/> | <input type="radio"/> | <input type="radio"/> | <input type="radio"/> | <input type="radio"/>      | <input type="radio"/> |  |
| 3-                            | <input type="radio"/> | <input type="radio"/> | <input type="radio"/> | <input type="radio"/> | <input type="radio"/> | <input type="radio"/>      | <input type="radio"/> |  |
| 最大分值 (30')                    |                       |                       |                       |                       |                       |                            |                       |  |

最大总分值 (100')

## 术后膝关节社会评分

| 患者基本信息（患者完成）                                      |                          |                                                 |
|---------------------------------------------------|--------------------------|-------------------------------------------------|
| 1-填写时间                                            | 2-出生日期                   | 时间格式                                            |
| □□/□□/□□                                          | □□/□□/□□                 | 月/日/年                                           |
| 3-身高（厘米）                                          | 4-体重（千克）                 | 5-性别                                            |
| _____ cm                                          | _____ Kg                 | <input type="radio"/> 男 <input type="radio"/> 女 |
| 6-有症状的膝关节（如果双膝都准备手术，则双侧膝关节各填写一份）                  |                          |                                                 |
| <input type="radio"/> 左 <input type="radio"/> 右   |                          |                                                 |
| 7-民族 _____                                        |                          |                                                 |
| 8-请说明你所希望的手术时间及手术医生名字                             |                          |                                                 |
| 日期 □□/□□/□□                                       | 手术医生名字 _____             |                                                 |
| 时间格式：月/日/年                                        |                          |                                                 |
| 9-初次膝关节置换还是翻修                                     |                          |                                                 |
| <input type="radio"/> 初次 <input type="radio"/> 翻修 |                          |                                                 |
| 医生完成部分                                            |                          |                                                 |
| 10-功能受限分类（使用以下代码） <input type="checkbox"/>        |                          |                                                 |
| A 单侧膝关节炎                                          | C1 TKR 但远期关节炎影响移动        |                                                 |
| B1 一侧 TKA, 对侧膝关节炎                                 | C2 TKR 但身体状况影响移动         |                                                 |
| B2 双侧 TKA                                         | C3 单侧或双侧 TKR 伴有单侧或双侧 THR |                                                 |



### 客观的膝关节指标（医生完成）

| 力线                  |                                                                                  |
|---------------------|----------------------------------------------------------------------------------|
| 1-解剖学力线：站立前后侧位 X 线片 | 最大值 25 分                                                                         |
| 中立位：2-10° 外翻 （25'）  | <input style="width: 60px; height: 40px; border: 1px solid black;" type="text"/> |
| 内翻：<2° 内翻 （-10'）    |                                                                                  |
| 外翻：>10° 外翻 （-10'）   |                                                                                  |

| 不稳定性                           |                                                                                  |
|--------------------------------|----------------------------------------------------------------------------------|
| 2-内/外侧不稳定性：完全伸直位测量             | 最大值 15 分                                                                         |
| 无 （15'）      轻微或<5mm （15'）     | <input style="width: 60px; height: 40px; border: 1px solid black;" type="text"/> |
| 中度或 5mm （5'）      重度或>5mm （0'） |                                                                                  |
| 3-前/后不稳定性：屈曲 90° 测量            | 最大值 10 分                                                                         |
| 无 （10'）      中度<5mm （5'）       | <input style="width: 60px; height: 40px; border: 1px solid black;" type="text"/> |
| 中度>5mm （0'）                    |                                                                                  |

| 关节活动                                           |                                                                                  |
|------------------------------------------------|----------------------------------------------------------------------------------|
| 4-活动范围（扣分项目，每 5° 为 1 分）                        | <input style="width: 60px; height: 40px; border: 1px solid black;" type="text"/> |
| 屈曲挛缩                                           | 扣分值                                                                              |
| 1-5° （-2'）                      6-10 （-5'）     | <input style="width: 60px; height: 40px; border: 1px solid black;" type="text"/> |
| 11-15° （-10'）                      >15° （-15'） |                                                                                  |
| 伸直受限                                           | 扣分值                                                                              |
| <10° （-5'）                      10-20° （-10'）  | <input style="width: 60px; height: 40px; border: 1px solid black;" type="text"/> |
| >20° （-15'）                                    |                                                                                  |

症状（患者完成）

1-走路时的疼痛程度

(10分)

|   |   |   |   |   |   |   |   |   |   |    |
|---|---|---|---|---|---|---|---|---|---|----|
| 0 | 1 | 2 | 3 | 4 | 5 | 6 | 7 | 8 | 9 | 10 |
|---|---|---|---|---|---|---|---|---|---|----|

无疼痛

严重疼痛

2-走楼梯或爬坡时疼痛程度

(10分)

|   |   |   |   |   |   |   |   |   |   |    |
|---|---|---|---|---|---|---|---|---|---|----|
| 0 | 1 | 2 | 3 | 4 | 5 | 6 | 7 | 8 | 9 | 10 |
|---|---|---|---|---|---|---|---|---|---|----|

无疼痛

严重疼痛

3-你感觉你的膝关节“正常”吗？

(5分)

经常 (5')    有时 (3')    从来没有过 (0')

最大总分值 (25分)

患者满意度（患者完成）

1-目前，坐下时，你对膝关节的疼痛水平满意吗？

(8分)

非常满意 (8')    满意 (6')    比较满意 (4')    不满意 (2')    非常不满意 (0')

2-目前，躺床上时，你对膝关节的疼痛水平满意吗？

(8分)

非常满意 (8')    满意 (6')    比较满意 (4')    不满意 (2')    非常不满意 (0')

3-目前，起床时，你对膝关节的功能满意吗？

(8分)

非常满意 (8')    满意 (6')    比较满意 (4')    不满意 (2')    非常不满意 (0')

4-目前，做轻微家务活时，你对膝关节的功能满意吗？

(8分)

非常满意 (8')    满意 (6')    比较满意 (4')    不满意 (2')    非常不满意 (0')

5-目前，散步时，你对膝关节的功能满意吗？（8分）

- 非常满意（8'）      满意（6'）      比较满意（4'）      不满意（2'）      非常不满意（0'）

最大总分值（40'）

患者的期待（患者完成）

与你行膝关节置换前的期望值做比较

1-我对缓解疼痛的期待值（5'）

- 太高-比期待值低很多（1'）      太高-比期待值低一些（2'）  
正好-满足期待值（3'）      太低-比期待值高一些（4'）  
太低-比期待值高很多（5'）

2-我对能完成日常生活中的正常活动的期待值（5'）

- 太高-比期待值低很多（1'）      太高-比期待值低一些（2'）  
正好-满足期待值（3'）      太低-比期待值高一些（4'）  
太低-比期待值高很多（5'）

3-我对完成休息、娱乐或体育活动的期待值（5'）

- 太高-比期待值低很多（1'）      太高-比期待值低一些（2'）  
正好-满足期待值（3'）      太低-比期待值高一些（4'）  
太低-比期待值高很多（5'）

最大总分（15'）

功能活动（患者完成）

|                                                                                                                                                             |                                     |
|-------------------------------------------------------------------------------------------------------------------------------------------------------------|-------------------------------------|
| 1-你可以行走不需要任何帮助吗？（如手杖、拐杖或轮椅）<br>○ 是                      ○ 不是                                                                                                | (0' )                               |
| 2-如果不是，需要使用以下哪些辅助物？<br>1. 轮椅 (-10' )    2. 助步器 (-8' )    3. 两根拐杖 (-8' )<br>4. 两根手杖(-6' )    5 一根拐杖(-4' )    6-一根手杖(-4' )<br>7. 护膝或者膝关节支具 (-2' )<br>其他 _____ | (-10' )<br><input type="checkbox"/> |
| 3-你使用这些辅助物是因为你的膝关节吗？<br>○ 是                      ○ 不是                                                                                                       | (0' )                               |
| 4. 由于膝关节感觉不适而坐前，你能站多长时间（在有或没有辅助物的情况下）？<br>1. 不能站立 (0' )    2. 0-5 分钟 (3' )    3. 6-15 分钟 (6' )<br>4. 16-30 分钟 (9' )    5. 31-60 分钟 (12' )    6. >1h (15' )  | (15' )<br><input type="checkbox"/>  |
| 5-由于膝关节不是而停下来之前，你能走多长时间（有或没有辅助物的情况下）？<br>1. 不能站立 (0' )    2. 0-5 分钟 (3' )    3. 6-15 分钟 (6' )<br>4. 16-30 分钟 (9' )    5. 31-60 分钟 (12' )    6. >1h (15' )   | (15' )<br><input type="checkbox"/>  |

最大分值 (30 分' )

活动标准 (30' )

| 在以下的每一个活动中你的膝关节困扰你多少? | 没有困扰<br>(5' )         | 轻微<br>(4' )           | 中等<br>(3' )           | 严重<br>(2' )           | 非常严重<br>(1' )         | 不能做<br>(因为膝关节)<br>(0' ) | 从来不做这个                |                      |
|-----------------------|-----------------------|-----------------------|-----------------------|-----------------------|-----------------------|-------------------------|-----------------------|----------------------|
| 1-不平地面上行走             | <input type="radio"/> | <input type="radio"/> | <input type="radio"/> | <input type="radio"/> | <input type="radio"/> | <input type="radio"/>   | <input type="radio"/> | <input type="text"/> |
| 2-转动或旋转腿              | <input type="radio"/> | <input type="radio"/> | <input type="radio"/> | <input type="radio"/> | <input type="radio"/> | <input type="radio"/>   | <input type="radio"/> | <input type="text"/> |
| 3-向上或向下爬一段楼梯          | <input type="radio"/> | <input type="radio"/> | <input type="radio"/> | <input type="radio"/> | <input type="radio"/> | <input type="radio"/>   | <input type="radio"/> | <input type="text"/> |
| 4-不需要手从矮沙发或椅子上起立      | <input type="radio"/> | <input type="radio"/> | <input type="radio"/> | <input type="radio"/> | <input type="radio"/> | <input type="radio"/>   | <input type="radio"/> | <input type="text"/> |
| 5-进出小汽车               | <input type="radio"/> | <input type="radio"/> | <input type="radio"/> | <input type="radio"/> | <input type="radio"/> | <input type="radio"/>   | <input type="radio"/> | <input type="text"/> |
| 6-侧移                  | <input type="radio"/> | <input type="radio"/> | <input type="radio"/> | <input type="radio"/> | <input type="radio"/> | <input type="radio"/>   | <input type="radio"/> | <input type="text"/> |
| 最大分值 (30' )           |                       |                       |                       |                       |                       |                         |                       | <input type="text"/> |

进一步活动 (25' )

|             |                       |                       |                       |                       |                       |                       |                       |                      |
|-------------|-----------------------|-----------------------|-----------------------|-----------------------|-----------------------|-----------------------|-----------------------|----------------------|
| 1-爬梯子或踏凳    | <input type="radio"/> | <input type="radio"/> | <input type="radio"/> | <input type="radio"/> | <input type="radio"/> | <input type="radio"/> | <input type="radio"/> | <input type="text"/> |
| 2-提购物袋走100米 | <input type="radio"/> | <input type="radio"/> | <input type="radio"/> | <input type="radio"/> | <input type="radio"/> | <input type="radio"/> | <input type="radio"/> | <input type="text"/> |
| 3-下蹲        | <input type="radio"/> | <input type="radio"/> | <input type="radio"/> | <input type="radio"/> | <input type="radio"/> | <input type="radio"/> | <input type="radio"/> | <input type="text"/> |
| 4-下跪        | <input type="radio"/> | <input type="radio"/> | <input type="radio"/> | <input type="radio"/> | <input type="radio"/> | <input type="radio"/> | <input type="radio"/> | <input type="text"/> |
| 5-跑         | <input type="radio"/> | <input type="radio"/> | <input type="radio"/> | <input type="radio"/> | <input type="radio"/> | <input type="radio"/> | <input type="radio"/> | <input type="text"/> |
| 最大分值 (25' ) |                       |                       |                       |                       |                       |                       |                       | <input type="text"/> |

## 任意活动

请挑选以下 3 种你认为对你最重要的活动  
(请不要写下额外的活动)

|                                                                                                                                                                                                                                                                                                                                                              |                                                                                                                                                                                                                                                                                        |
|--------------------------------------------------------------------------------------------------------------------------------------------------------------------------------------------------------------------------------------------------------------------------------------------------------------------------------------------------------------|----------------------------------------------------------------------------------------------------------------------------------------------------------------------------------------------------------------------------------------------------------------------------------------|
| <b>娱乐活动</b><br><input type="checkbox"/> 游泳<br><input type="checkbox"/> 高尔夫 (18 杆)<br><input type="checkbox"/> 公路自行车骑行 (>30 分钟)<br><input type="checkbox"/> 园艺工作<br><input type="checkbox"/> 打保龄球<br><input type="checkbox"/> 球拍类运动 (如网球、回力网球等)<br><input type="checkbox"/> 距离行走<br><input type="checkbox"/> 跳舞/芭蕾舞<br><input type="checkbox"/> 拉伸运动 (拉伸你的肌肉) | <b>锻炼和健身活动</b><br><input type="checkbox"/> 举重<br><input type="checkbox"/> 腿扩展<br><input type="checkbox"/> 楼梯爬行<br><input type="checkbox"/> 任意骑自行车/旋转<br><input type="checkbox"/> 腿推举<br><input type="checkbox"/> 慢跑<br><input type="checkbox"/> 空中漫步机<br><input type="checkbox"/> 有氧运动 |
|--------------------------------------------------------------------------------------------------------------------------------------------------------------------------------------------------------------------------------------------------------------------------------------------------------------------------------------------------------------|----------------------------------------------------------------------------------------------------------------------------------------------------------------------------------------------------------------------------------------------------------------------------------------|

请把以上已选的三种活动写入一下的空格中

在以下的每一个活动中你的膝关节困扰你多少？

| 活动 (写上从上面的列表<br>中选 3 种活<br>动) | 没有<br>困扰<br>(5')      | 轻微<br>(4')            | 中等<br>(3')            | 严重<br>(2')            | 非常<br>严重<br>(1')      | 不能做<br>(因为<br>膝关节)<br>(0') | 从来<br>不做<br>这个        |  |
|-------------------------------|-----------------------|-----------------------|-----------------------|-----------------------|-----------------------|----------------------------|-----------------------|--|
| 1-                            | <input type="radio"/> | <input type="radio"/> | <input type="radio"/> | <input type="radio"/> | <input type="radio"/> | <input type="radio"/>      | <input type="radio"/> |  |
| 2-                            | <input type="radio"/> | <input type="radio"/> | <input type="radio"/> | <input type="radio"/> | <input type="radio"/> | <input type="radio"/>      | <input type="radio"/> |  |
| 3-                            | <input type="radio"/> | <input type="radio"/> | <input type="radio"/> | <input type="radio"/> | <input type="radio"/> | <input type="radio"/>      | <input type="radio"/> |  |
| 最大分值 (30')                    |                       |                       |                       |                       |                       |                            |                       |  |

最大总分值 (100')
